# Supplementary material
Source: PubMed Central journal article supplement (PMC3567659)
Supplement: supp_M111.317487_jbc.M111.317487-1.pdf [file supp_M111.317487_jbc.M111.317487-1.pdf]

Figure S1

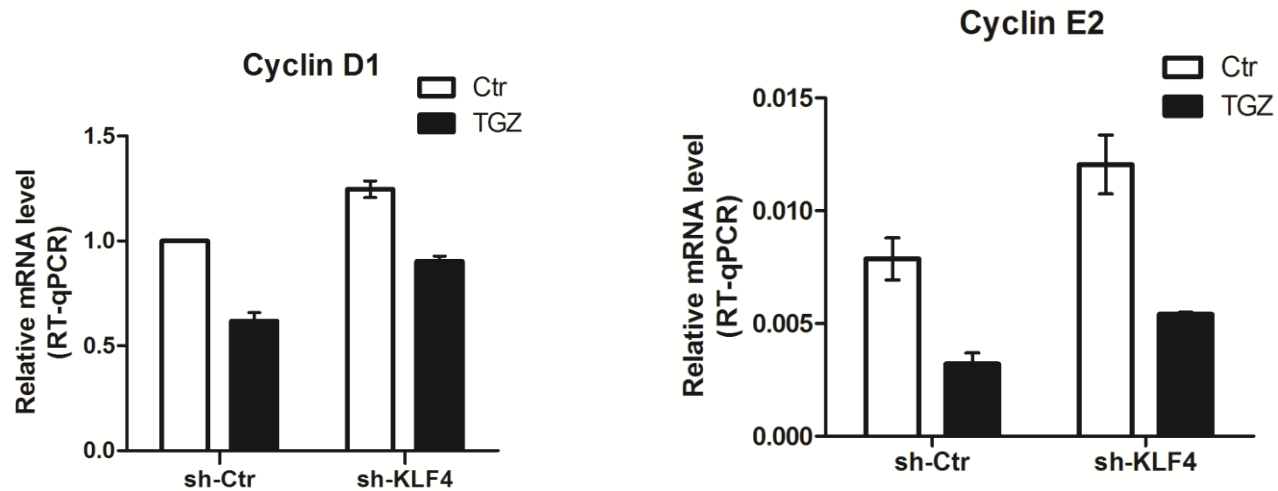

Figure S1. HCT116 sh-ctr and sh-KLF4 cells were grown in the absence of serum for 18 h and then incubated with DMSO (Ctr) or TGZ (10  $\mu$ M) for 24 h, the expression of Cyclin D1 and Cyclin E2 was determined by RT-qPCR.

Figure S2

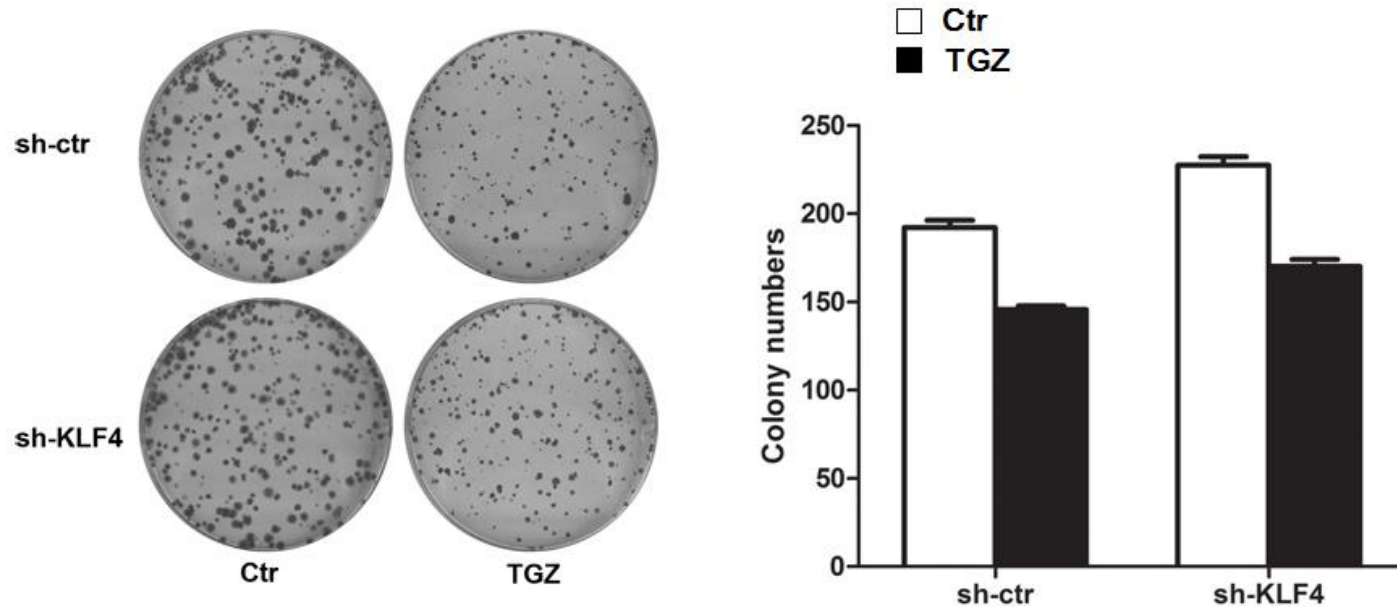

Figure S2. HCT-116 sh-ctr and sh-KLF4 cells were incubated with DMSO (Ctr) or TGZ (10  $\mu$ M) for the indicated time and long-term cell survival was determined by colony formation assays. Error bars represent mean  $\pm$  SD from 3 independent experiments

Figure S3

A

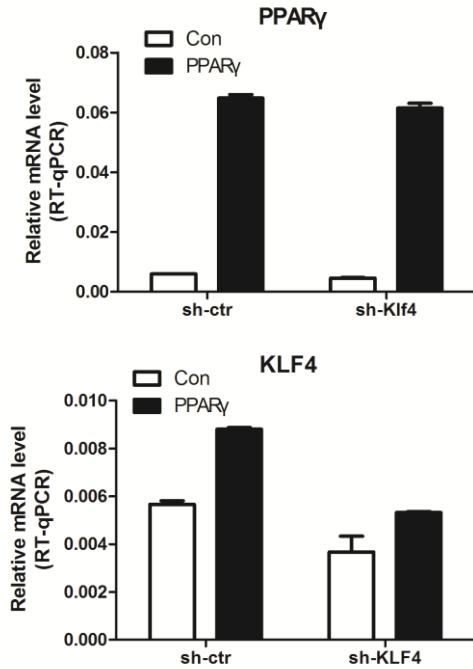

B

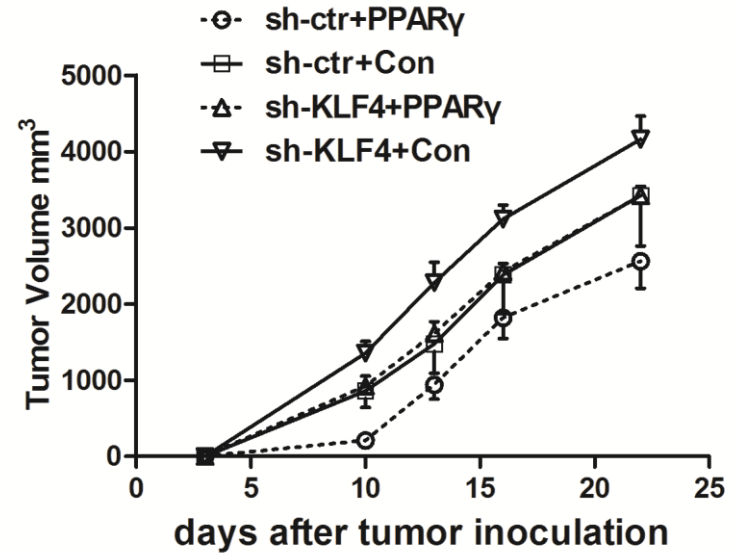

Figure S3. (A) HCT-116 sh-ctr and sh-KLF4 cells were stably transfected with or without PPAR $\gamma$  expression plasmid. The expression of PPAR $\gamma$  and KLF4 was determined by RT-qPCR. (B) HCT116 sh-ctr+PPAR $\gamma$ , sh-ctr+Con, sh-KLF4+PPAR $\gamma$ , and sh-KLF4+Con cells ( $1 \times 10^6$  per mouse) were injected subcutaneously into the flanks of nude (nu/nu) mice (n=5). Tumor size was measured, and volume was determined according to the formula  $(W^2 \times L)/2$ . Data are shown as the mean  $\pm$  SD.

Figure S4

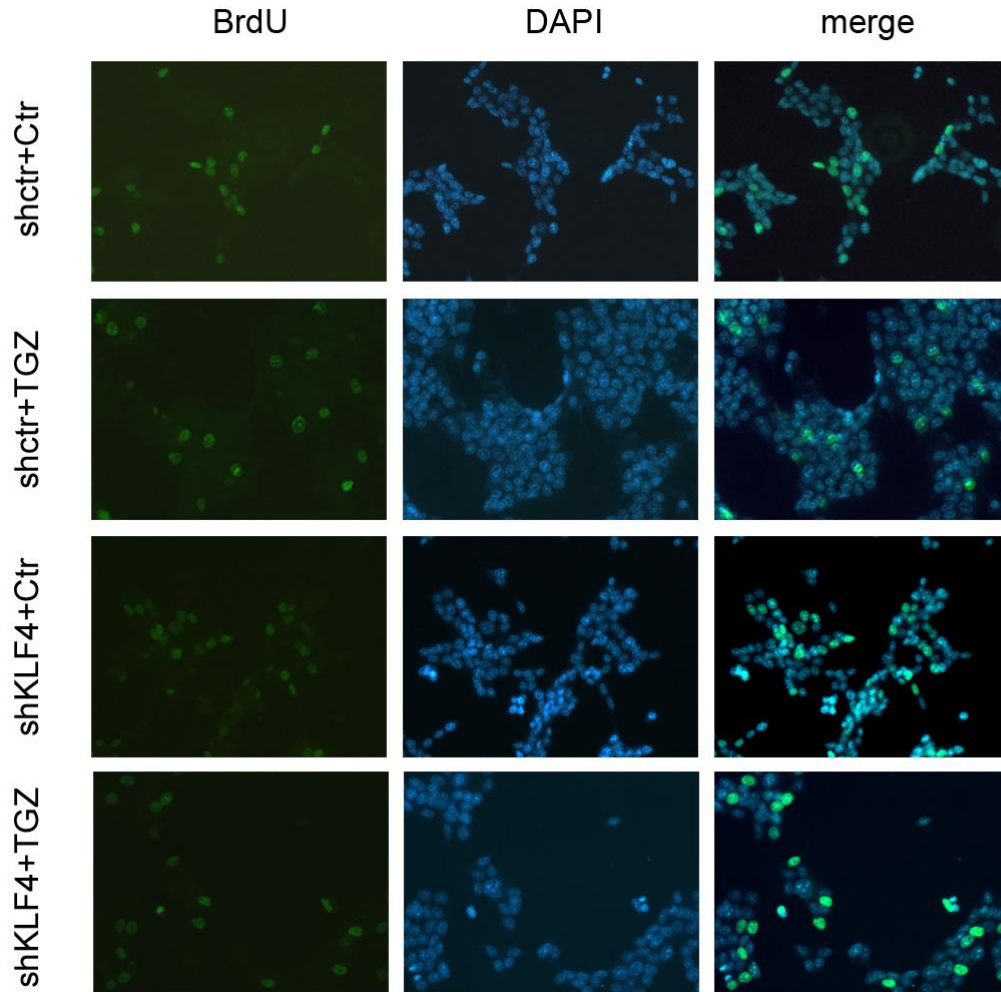

Figure S4. HCT116 sh-ctr and sh-KLF4 cells were left untreated or treated with 10 $\mu$ M TGZ for 48 h, then analyzed by BrdU incorporation using the BrdU Cell Proliferation ELISA kit.

Figure S5

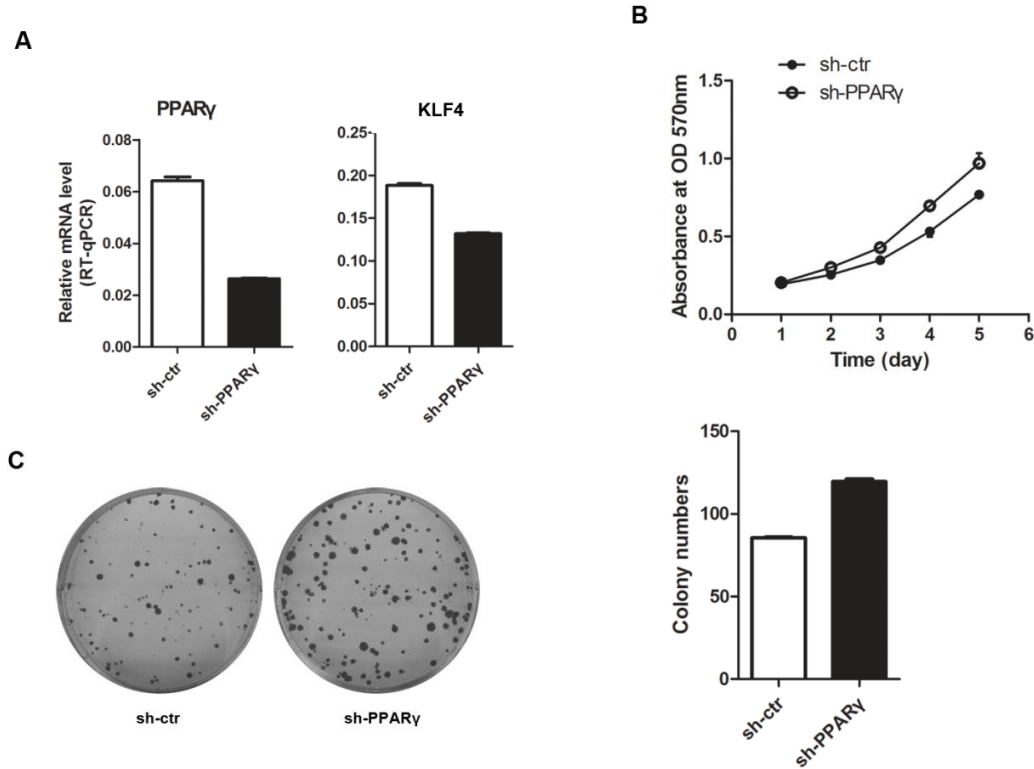

Figure S5. (A) The expression of PPAR $\gamma$  and KLF4 was determined in HCT-116 sh-ctr and sh-PPAR $\gamma$  cells by RT-qPCR. (B) HCT-116 sh-ctr and sh-PPAR $\gamma$  cells were incubated for the indicated time and cell growth inhibition was detected using MTS assay. Values were the mean  $\pm$  SD of absorbance at 570 nm for three independent experiments. (C) Long-term cell survival was determined by colony formation assays. Error bars represent mean  $\pm$  SD from 3 independent experiments.
